# Supplementary material
Source: PubMed Central journal article supplement (PMC5885882)
Supplement: jama-319-993-s001.pdf [file jama-319-993-s001.pdf]

## **Supplementary Online Content 1**

van Meenen DMP, van der Hoeven SM, Binnekade JM, et al. Effect of on-demand vs routine nebulization of acetylcysteine with salbutamol on ventilator-free days in intensive care unit patients receiving invasive ventilation: a randomized clinical trial. *JAMA*. doi: 10.1001/jama.2018.0949

### **Study Protocol**

**PROTOCOL TITLE 'Effectiveness of routine nebulisation of mucolytics and bronchodilators in mechanically ventilated intensive care patients'**

|                                       |                                                                                                                                                                                                                                                                                                                                                                                                                                                                                                                                                                               |
|---------------------------------------|-------------------------------------------------------------------------------------------------------------------------------------------------------------------------------------------------------------------------------------------------------------------------------------------------------------------------------------------------------------------------------------------------------------------------------------------------------------------------------------------------------------------------------------------------------------------------------|
| <b>Protocol ID</b>                    | <b>Nebulae NL47807 018 14</b>                                                                                                                                                                                                                                                                                                                                                                                                                                                                                                                                                 |
| <b>Short title</b>                    | <b>Effectiveness of routine nebulisation of mucolytics and bronchodilators in intubated and mechanically ventilated patients</b>                                                                                                                                                                                                                                                                                                                                                                                                                                              |
| <b>EudraCT number</b>                 | <b>N.A.</b>                                                                                                                                                                                                                                                                                                                                                                                                                                                                                                                                                                   |
| <b>Version</b>                        | <b>6.0</b>                                                                                                                                                                                                                                                                                                                                                                                                                                                                                                                                                                    |
| <b>Coordinating investigator</b>      | Sophia van der Hoeven<br>Department of Intensive Care<br>Academic Medical Center, University of Amsterdam<br>Meibergdreef 9, G3-228<br>1105 AZ Amsterdam, The Netherlands<br>Telephone: +31-20-5666345<br>E-mail: <a href="mailto:s.m.vanderhoeven@amc.uva.nl">s.m.vanderhoeven@amc.uva.nl</a><br>David van Meenen<br>Department of Intensive Care<br>Academic Medical Center, University of Amsterdam<br>Meibergdreef 9, C3-311<br>1105 AZ Amsterdam, The Netherlands<br>Telephone: +31-20-5666339<br>E-mail: <a href="mailto:d.m.vanmeenen@amc.nl">d.m.vanmeenen@amc.nl</a> |
| <b>Principal investigator</b>         | Marcus J. Schultz, MD PhD<br>C3-415<br>Department of Intensive Care<br>Academisch Medisch Centrum Amsterdam<br>Meibergdreef 9, C3-415<br>1105 AZ Amsterdam<br>The Netherlands<br>Telephone: +31-20-5662509; pager 58268<br>E-mail: <a href="mailto:marcus.j.schultz@gmail.com">marcus.j.schultz@gmail.com</a>                                                                                                                                                                                                                                                                 |
| <b>Multicenter research: per site</b> | H. S. Moeniralam, MD PhD                                                                                                                                                                                                                                                                                                                                                                                                                                                                                                                                                      |

Sint Antonius ziekenhuis Nieuwegein  
Department of Intensive Care  
Koekoekslaan 1  
3430 EM Nieuwegein  
Telephone 088 3204729  
[h.moeniralam@antoniuziekenhuis.nl](mailto:h.moeniralam@antoniuziekenhuis.nl)

B.J. van der Meer, MD PhD  
Amphia Ziekenhuis Breda:  
Department of Intensive care  
Molengracht 21  
4818 Ck Breda  
Telephone 076 5955000  
[bvandermeer@amphia.nl](mailto:bvandermeer@amphia.nl)

H. Endeman, MD PhD  
Onze Lieve Vrouwe Gasthuis Amsterdam:  
Department of Intensive Care  
Oosterparkstraat 9  
1090 HM Amsterdam  
Telephone 020 5993007 / 5994704  
[h.endeman@olvg.nl](mailto:h.endeman@olvg.nl)

F.H. Bosch, MD PhD  
Rijnstate Ziekenhuis Arnhem  
Department of Intensive Care  
Wagnerlaan 55  
6815 AD Arnhem  
Telephone 088 - 005 8888  
[FHBosch@rijnstate.nl](mailto:FHBosch@rijnstate.nl)

M. Slabbekorn, MD PhD  
Medisch Centrum Haaglanden:  
Department of Intensive Care  
Lijnbaan 32  
2512 VA Den Haag  
Telephone 070 357 44 27  
[slamat@mchaaglanden.nl](mailto:slamat@mchaaglanden.nl)

**Sponsor (in Dutch:  
verrichter/opdrachtgever)**

**Academic Medical Center Amsterdam**

|                               |                                                                                                                                                                                                                          |
|-------------------------------|--------------------------------------------------------------------------------------------------------------------------------------------------------------------------------------------------------------------------|
| <b>Subsidising party</b>      | ZonMW<br>Laan van Nieuw Oost-Indië 334,<br>2593 CE Den Haag, The Netherlands<br>Telephone: +31 70 3495111<br>E-mail: info@zonmw.nl ZonMW                                                                                 |
| <b>Independent expert (s)</b> | Dr. D.A. Dongelmans<br>Department of Intensive Care<br>Room G3-221<br>Academic Medical Center<br>Meibergdreef 9,<br>1105 AZ Amsterdam, The Netherlands<br>Telephone: +31 20 5666336<br>E-mail: d.a.dongelmans@amc.uva.nl |
| <b>Laboratory sites</b>       | <b>NA</b>                                                                                                                                                                                                                |
| <b>Pharmacy</b>               | <b>NA</b>                                                                                                                                                                                                                |

29 **PROTOCOL SIGNATURE SHEET**

30

| <b>Name</b>                                                                                                                          | <b>Signature</b> | <b>Date</b> |
|--------------------------------------------------------------------------------------------------------------------------------------|------------------|-------------|
| <b>Head of Department:</b><br><i>Prof. dr. M.B. Vroom</i><br><i>Professor of Intensive Care Medicine</i>                             |                  |             |
| <b>Principal Investigator:</b><br><i>Prof. dr. Marcus J. Schultz</i><br><i>Professor of Experimental Intensive<br/>Care Medicine</i> |                  |             |

31

32

|    |                                                                               |    |
|----|-------------------------------------------------------------------------------|----|
| 33 | <b>TABLE OF CONTENTS</b>                                                      |    |
| 34 | 1. INTRODUCTION AND HYPOTHESIS .....                                          | 13 |
| 35 | 1.2 Uncertainty over the effectiveness and side effects: .....                | 13 |
| 36 | 1.3 Rational for this study: .....                                            | 13 |
| 37 | 2. OBJECTIVES .....                                                           | 15 |
| 38 | 2.1 Primary Objective: .....                                                  | 15 |
| 39 | 2.2 Secondary Objectives.....                                                 | 15 |
| 40 | 3. STUDY DESIGN.....                                                          | 16 |
| 41 | 4. STUDY POPULATION .....                                                     | 17 |
| 42 | 4.1 Population.....                                                           | 17 |
| 43 | 4.2 Inclusion criteria.....                                                   | 17 |
| 44 | 4.3 Exclusion criteria .....                                                  | 17 |
| 45 | 4.4 Sample size calculation .....                                             | 18 |
| 46 | 5. TREATMENT OF SUBJECTS .....                                                | 19 |
| 47 | 5.1 Investigational product/treatment .....                                   | 19 |
| 48 | 5.2 Concomitant medication: .....                                             | 20 |
| 49 | 5.3 Standard procedures .....                                                 | 20 |
| 50 | 5.3.1 Mechanical ventilation.....                                             | 20 |
| 51 | 5.3.2 Tracheostomy: .....                                                     | 21 |
| 52 | 5.3.3 Airway Care: .....                                                      | 21 |
| 53 | 5.3.4 Sedation and comfort protocol: .....                                    | 22 |
| 54 | 5.3.5 Fluid management: .....                                                 | 22 |
| 55 | 5.3.6 Nutrition.....                                                          | 22 |
| 56 | 6. INVESTIGATIONAL PRODUCT.....                                               | 23 |
| 57 | 6.1 Name and description of investigational products:.....                    | 23 |
| 58 | 6.2 Summary of findings from non-clinical studies .....                       | 23 |
| 59 | 6.3 Summary of findings from clinical studies .....                           | 23 |
| 60 | 6.4 Summary of known and potential risks and benefits .....                   | 24 |
| 61 | 6.5 Description and justification of route of administration and dosage ..... | 25 |
| 62 | 6.6 Dosages, dosage modifications and method of administration .....          | 25 |
| 63 | 6.7 Drug accountability .....                                                 | 25 |
| 64 | 7. NON-INVESTIGATIONAL PRODUCT .....                                          | 26 |
| 65 | 7.1 Name and description of non-investigational product(s) .....              | 25 |
| 66 | 7.2 Summary of findings from non-clinical studies .....                       | 25 |
| 67 | 7.3 Summary of findings from clinical studies .....                           | 25 |
| 68 | 7.4 Summary of known and potential risks and benefits .....                   | 25 |
| 69 | 7.5 Description and justification of route of administration and dosage ..... | 25 |

## **C1. Onderzoeksprotocol Nebulae NL47807 018 14, versie 6**

---

|     |                                                                                    |    |
|-----|------------------------------------------------------------------------------------|----|
| 70  | 7.6 Dosages, dosage modifications and method of administration .....               | 25 |
| 71  | 7.7 Preparation and labelling of non investigational medicinal product .....       | 25 |
| 72  | 7.8 Drug accountability .....                                                      | 25 |
| 73  | 8. METHODS.....                                                                    | 27 |
| 74  | 8.1 Study parameters/endpoints.....                                                | 27 |
| 75  | 8.1.1 Main study parameter/endpoint.....                                           | 27 |
| 76  | 8.1.2 Secondary study parameters/endpoints.....                                    | 27 |
| 77  | 8.2 Randomisation, blinding and treatment allocation.....                          | 27 |
| 78  | 8.3 Study procedures .....                                                         | 28 |
| 79  | 8.4 Data to be collected.....                                                      | 28 |
| 80  | 8.4.1 On admission and on the ICU:.....                                            | 28 |
| 81  | 8.4.2 Baseline parameters 1 hour after intubation: .....                           | 29 |
| 82  | 8.4.3 Data collected daily from day 1 till extubation* .....                       | 29 |
| 83  | 8.4.4 Data collected daily from extubation* till discharge from the hospital ..... | 30 |
| 84  | 8.4.5 Data collected at day 90 of follow up .....                                  | 30 |
| 85  | 8.4.5 Data to be collected for the economic evaluation .....                       | 31 |
| 86  | 8.5 Withdrawal of individual subjects.....                                         | 32 |
| 87  | 8.5.1 Specific criteria for withdrawal .....                                       | 32 |
| 88  | 8.6 Replacement of individual subjects after withdrawal .....                      | 32 |
| 89  | 8.7 Follow-up of subjects withdrawn from treatment .....                           | 32 |
| 90  | 8.8 Premature termination of the study .....                                       | 33 |
| 91  | 9. SAFETY REPORTING .....                                                          | 34 |
| 92  | 9.1 Section 10 WMO event.....                                                      | 34 |
| 93  | 9.2 AEs, and SAEs .....                                                            | 34 |
| 94  | 9.2.1 Adverse events (AEs) .....                                                   | 34 |
| 95  | 9.2.2 Serious adverse events (SAEs).....                                           | 34 |
| 96  | 9.3 Follow-up of adverse events.....                                               | 36 |
| 97  | 9.4 Data Safety Monitoring Board (DSMB).....                                       | 36 |
| 98  | 10. STATISTICAL ANALYSIS .....                                                     | 37 |
| 99  | 10.1 General considerations.....                                                   | 37 |
| 100 | 10.2 Primary study parameter(s) .....                                              | 37 |
| 101 | 10.3 Secondary study parameters.....                                               | 38 |
| 102 | 10.4 Interim analysis.....                                                         | 38 |
| 103 | 10.5 Economic Evaluation.....                                                      | 38 |
| 104 | 11. ETHICAL CONSIDERATIONS .....                                                   | 41 |
| 105 | 11.1 Regulation statement.....                                                     | 41 |
| 106 | 11.2 Recruitment and consent.....                                                  | 41 |

## **C1. Onderzoeksprotocol Nebulae NL47807 018 14, versie 6**

---

|     |      |                                                         |    |
|-----|------|---------------------------------------------------------|----|
| 107 | 11.3 | Benefits and risks assessment, group relatedness .....  | 41 |
| 108 | 11.4 | Compensation for injury .....                           | 42 |
| 109 | 11.5 | Incentives .....                                        | 42 |
| 110 | 12.  | ADMINISTRATIVE ASPECTS, MONITORING AND PUBLICATION..... | 43 |
| 111 | 12.1 | Handling and storage of data and documents .....        | 43 |
| 112 | 12.2 | Monitoring and Quality Assurance.....                   | 43 |
| 113 | 12.3 | Amendments .....                                        | 43 |
| 114 | 12.4 | Annual progress report .....                            | 44 |
| 115 | 12.5 | End of study report .....                               | 44 |
| 116 | 12.6 | Public disclosure and publication policy .....          | 44 |
| 117 | 13.  | STRUCTURED RISK ANALYSIS.....                           | 45 |
| 118 | 13.1 | Synthesis .....                                         | 45 |
| 119 | 14.  | REFERENCES .....                                        | 46 |
| 120 |      |                                                         |    |



| <b>LIST OF ABBREVIATIONS AND RELEVANT DEFINITIONS</b> |                                                                                                                                                                                                                                                                                                                                                  |
|-------------------------------------------------------|--------------------------------------------------------------------------------------------------------------------------------------------------------------------------------------------------------------------------------------------------------------------------------------------------------------------------------------------------|
| <b>ABR</b>                                            | <b>ABR form, General Assessment and Registration form, is the application form that is required for submission to the accredited Ethics Committee (In Dutch, ABR = Algemene Beoordeling en Registratie)</b>                                                                                                                                      |
| <b>AE</b>                                             | <b>Adverse Event</b>                                                                                                                                                                                                                                                                                                                             |
| <b>ARDS</b>                                           | <b>Acute Respiratory Distress Syndrome</b>                                                                                                                                                                                                                                                                                                       |
| <b>CA</b>                                             | <b>Competent Authority</b>                                                                                                                                                                                                                                                                                                                       |
| <b>CCMO</b>                                           | <b>Central Committee on Research Involving Human Subjects; in Dutch: Centrale Commissie Mensgebonden Onderzoek</b>                                                                                                                                                                                                                               |
| <b>CV</b>                                             | <b>Curriculum Vitae</b>                                                                                                                                                                                                                                                                                                                          |
| <b>CVVH</b>                                           | <b>Continuous Venovenous Hemofiltration</b>                                                                                                                                                                                                                                                                                                      |
| <b>DSMB</b>                                           | <b>Data Safety Monitoring Board</b>                                                                                                                                                                                                                                                                                                              |
| <b>GCP</b>                                            | <b>Good Clinical Practice</b>                                                                                                                                                                                                                                                                                                                    |
| <b>IC</b>                                             | <b>Informed Consent</b>                                                                                                                                                                                                                                                                                                                          |
| <b>ICU</b>                                            | <b>Intensive Care Unit</b>                                                                                                                                                                                                                                                                                                                       |
| <b>METC</b>                                           | <b>Medical research ethics committee (MREC); in Dutch: medisch ethische toetsing commissie (METC)</b>                                                                                                                                                                                                                                            |
| <b>NAC</b>                                            | <b>N-Acetylcysteine</b>                                                                                                                                                                                                                                                                                                                          |
| <b>PEEP</b>                                           | <b>Positive End Expiratory Pressure</b>                                                                                                                                                                                                                                                                                                          |
| <b>(S)AE</b>                                          | <b>(Serious) Adverse Event</b>                                                                                                                                                                                                                                                                                                                   |
| <b>SDD</b>                                            | <b>selective digestive tract decontamination</b>                                                                                                                                                                                                                                                                                                 |
| <b>SPC</b>                                            | <b>Summary of Product Characteristics (in Dutch: officiële productinformatie IB1-tekst)</b>                                                                                                                                                                                                                                                      |
| <b>Sponsor</b>                                        | <b>The sponsor is the party that commissions the organisation or performance of the research, for example a pharmaceutical company, academic hospital, scientific organisation or investigator. A party that provides funding for a study but does not commission it is not regarded as the sponsor, but referred to as a subsidising party.</b> |
| <b>VAP</b>                                            | <b>Ventilator Associated Pneumonia</b>                                                                                                                                                                                                                                                                                                           |

|             |                                                                                                                    |
|-------------|--------------------------------------------------------------------------------------------------------------------|
| <b>VFDs</b> | <b>Ventilator Free Day's</b>                                                                                       |
| <b>Wbp</b>  | <b>Personal Data Protection Act (in Dutch: Wet Bescherming Persoonsgegevens)</b>                                   |
| <b>WMO</b>  | <b>Medical Research Involving Human Subjects Act (in Dutch: Wet Medisch-wetenschappelijk Onderzoek met Mensen)</b> |

122

### 123 **SUMMARY**

124 **Rationale:** Routine nebulisation of mucolytics and bronchodilators is a frequently  
125 used preventive strategy in intubated and mechanically ventilated intensive care unit  
126 (ICU) patients. The aim of routine nebulisation of mucolytics and bronchodilators is to  
127 prevent sputum plugging and as such atelectasis. It is highly uncertain whether this  
128 expensive strategy is effective, and whether we should restrict nebulisation of  
129 mucolytics and bronchodilators to those patients in whom sputum plugging is a  
130 problem.

131 **Hypothesis:** We hypothesize that a strategy restricting nebulisation to patients with  
132 sputum plugging is as effective as, but cheaper and safer than, a strategy using  
133 routine nebulisation in all intubated and mechanically ventilated ICU patients.

134 **Objective:** The primary objective of this study is to determine the effectiveness of a  
135 strategy using routine nebulisation of mucolytics and bronchodilators as compared to  
136 a strategy that uses nebulisation only on clinical indication in intubated and ventilated  
137 ICU patients. In addition we aim to compare safety, and related health care costs of  
138 both strategies.

139 **Study design:** This study is an investigator initiated multicenter randomized  
140 controlled non-inferiority trial in intubated and ventilated ICU patients.

141 **Study population:** Consecutive intubated and ventilated adult ICU patients with an  
142 anticipated duration of ventilation > 24 hours.

143 **Intervention:** Routine nebulisation of mucolytics and bronchodilators administered  
144 every 6 hours (i.e., in all patients for the complete duration of intubation and  
145 mechanical ventilation) is compared to nebulisation of mucolytics and bronchodilators  
146 on strict clinical indication (i.e., only if a patient shows to have problems with sputum  
147 clearance or bronchospasm).

148 **Main study parameters/endpoints:** The primary endpoint is the number of  
149 ventilator-free days (VFDs), defined as the number of days from day 1 to day 28 after  
150 ICU admission and start of mechanical ventilation. Secondary endpoints include ICU  
151 and hospital length of stay and mortality, incidence of secondary ARDS, ventilator-  
152 associated pneumonia, atelectasis and side effects of nebulisation of mucolytics and  
153 bronchodilators. Also, related health care costs will be estimated with a cost benefit –  
154 and budget impact analysis.

155 **Nature and extent of the burden and risks associated with participation, benefit  
156 and group relatedness:** Benefits and risks of routine nebulisation of mucolytics and

157 bronchodilators in mechanical ventilated patients are unknown. This procedure is  
158 suggested to prevent endotracheal tube occlusion and sputum plugging, by diluting  
159 sputum, although no solid research is conducted. Nebulisation of acetylcysteine  
160 could induce bronchospasm while nebulisation of salbutamol may be associated with  
161 tachycardia, tachyarrhythmia, tremor and agitation.  
162

163 **1. INTRODUCTION AND HYPOTHESIS**

164

165 **1.1 Routine nebulisation in mechanical ventilated patients:**

166 Routine nebulisation of mucolytics and bronchodilators is a frequently used  
167 preventive strategy in intubated and mechanically ventilated intensive care unit (ICU)  
168 patients<sup>1-3</sup> This strategy is suggested to dilute pulmonary secretions and as such to  
169 prevent sputum plugging in sedated and paralyzed patients who are less able to  
170 clear their airways through coughing<sup>1-4</sup>.

171

172 **1.2 Uncertainty over the effectiveness and side effects:**

173 Whether this preventive strategy truly benefits ICU patients is highly unknown. There  
174 is no evidence that the routine nebulisation of mucolytics and bronchodilators  
175 reduces the risk of tube obstruction, duration of ventilation or the risk of ventilator  
176 induced pneumonia. Randomized controlled trials have addressed neither the clinical  
177 efficacy nor the economic consequences of routine nebulisation of mucolytics and  
178 bronchodilators in intubated and ventilated ICU patients. Notably, as with every  
179 pharmacological intervention, nebulisation of mucolytics and bronchodilators carries  
180 risks of side effects. First, there is the risk for pulmonary related adverse effects,  
181 including increased airway resistance due to bronchoconstriction<sup>1</sup> and increased risk  
182 for development of ventilator-associated pneumonia<sup>5</sup>. Second, nebulisation  
183 interferes with the patient-ventilator interaction, which may lead to hypoventilation,  
184 decreased oxygenation and anxiety<sup>6</sup>. Additionally, nebulizing mucolytics and  
185 bronchodilators is associated with systemic effects and may contribute to the  
186 generation of tachycardia, tachyarrhythmia -especially in patients with underlying  
187 cardiac disorders, although results are inconclusive-, tremor, and agitation<sup>1,7-10</sup>.

188

189 **1.3 Rational for this study:**

190 The care for ventilated ICU patients has changed fundamentally. Indeed, while deep  
191 hypnosedation and neuromuscular blocking agents were used in almost all intubated  
192 and ventilated ICU patients in the early years of ICU medicine, nowadays these  
193 patients preferably receive analgo-sedation and almost never neuromuscular  
194 blocking agents. While deep hypno-sedation and paralysis could promote stasis of  
195 airway secretions, analgo-sedation increasingly allows patients to cough and as

196 such clear the airways from sputum themselves. Also, ICU patients are mobilized  
197 more early in the course of disease<sup>11</sup>, which could prevent atelectasis.  
198 We hypothesize that a strategy restricting nebulisation to patients with sputum  
199 plugging is as effective as, but cheaper and safer than a strategy using routine  
200 nebulisation in all intubated and mechanically ventilated ICU patients.  
201

202 **2. OBJECTIVES**

203

204 **2.1 Primary Objective:**

205 The primary objective of this study is to determine whether a strategy using  
206 nebulisation of mucolytics and bronchodilators on strict clinical indication has equal  
207 effectiveness compared to routine nebulisation in intubated and ventilated ICU  
208 patients, in terms of number of ventilator-free days.

209

210 **2.2 Secondary Objectives**

211 Secondary objectives are to compare the effects of both nebulisation strategies on  
212 ICU- and hospital length of stay, mortality, incidence of secondary ARDS, ventilator-  
213 associated pneumonia, atelectasis, and side effects of nebulisation of mucolytics and  
214 bronchodilators. Also, related health care costs will be estimated.

215

216 **3. STUDY DESIGN**

217 This will be an investigator–initiated, multi–center, randomized, controlled, parallel  
218 two group, non-inferiority trial in intubated and ventilated adult ICU patients. A total of  
219 950 patients in 6 participating centers will be included.

220



221 **4. STUDY POPULATION**

222

223 **4.1 Population**

224 Consecutive intubated and ventilated adult intensive care patients with an anticipated  
225 ventilation duration of minimal 24 hours will be recruited at onset of ventilation.

226 Patients are recruited in the ICUs of 6 centers in The Netherlands. We will randomize  
227 a total of 950 patients. It is expected that each participating center will randomize  
228 approximately 160 patients.

229

230

231 **4.2 Inclusion criteria**

232 In order to be eligible to participate in this study, a patient must meet all of the  
233 following criteria:

- 234 • Age 18 year or older;  
235 • Expected duration of intubation and ventilation > 24 hours, as judged by the ICU  
236 staff at time of admission;  
237 • Written informed consent.

238

239 **4.3 Exclusion criteria**

240 A patient who meets any of the following criteria will be excluded from participation in  
241 this study:

- 242 • Age less than 18 years;  
243 • Ventilation before present ICU admission (though short-term ventilation in the  
244 emergency room or in the operation room for general anesthesia during surgery is  
245 allowed);  
246 • Suspected or confirmed pregnancy;  
247 • Diagnosed with lung diseases for which inhalation therapy and/or oral steroids are  
248 used;  
249 • Diagnoses of: Guillain-Barré syndrome, complete spinal cord lesion or  
250 amyotrophic lateral sclerosis, Multiple Sclerosis, Myasthenia Gravis  
251 • Known allergy for acetylcysteine or salbutamol

252

253 **4.4 Sample size calculation**

254

255 Group size calculation is focused on demonstrating non-inferiority. When the sample  
256 size in each group is 445 (890 patients in total), an one-sided non-inferiority test  
257 (targeted at 0.05) for log-transformed normalized data has 80% power to reject the  
258 null hypothesis that the number of ventilator-free days (VFDs) in the intervention  
259 group (nebulisation on strict clinical indication) is inferior to the number of VFDs in the  
260 control group (routine nebulisation) by a margin of 10% and a coefficient of variation  
261 of 0.70, in favor of the alternative hypothesis that the number of VFDs in the  
262 intervention group is non-inferior. The choice for a margin of 10% is motivated by  
263 what we consider acceptable from a clinical point of view as the maximal acceptable  
264 reduction of the ventilator-free period for non-inferiority. Clinically this margin means  
265 that an increase of > 10% in the duration of mechanical ventilation will reduce the  
266 ventilator free days with > 12 hours (calculated over the mean duration of mechanical  
267 ventilation of 5 days) which will be considered inferior, assuming that the data will be  
268 analyzed in the log scale using t-test for differences in means at the 5% level. To  
269 allow for an anticipated drop out of approximately 5%, a number of 475 (950 in total)  
270 patients will be included in each group.

271

272 R Core Team (2013). R: A language and environment for statistical computing. R  
273 Foundation for Statistical Computing, Vienna, Austria. URL <http://www.R-project.org/>.  
274 Sample size is calculated in R (package PowerTost)

275

276

277 **5. TREATMENT OF SUBJECTS**

278

279 **5.1 Investigational product/treatment**

280 Patients will be randomized in a 1:1 ratio to receive either:

- 281 - 'routine nebulisation', i.e. nebulisation of mucolytics and bronchodilators,  
282 administered every 6 hours (i.e., 4 times per day) for the complete duration of  
283 ventilation, or  
284 - 'nebulisation on strict clinical indications only', i.e. nebulisation of mucolytics in case  
285 of occurrence of persistent thick and tenacious sputum (Suzakawa criteria class  
286 3<sup>13</sup>), and only after active humidification is set. Nebulisation of bronchodilators in  
287 case of occurrence of bronchospasm and only when signs and symptoms of  
288 bronchospasm (wheezing, increased airway pressures, increasing airway  
289 resistance, up sloping curve of de end tidal CO<sub>2</sub> monitoring) are confirmed. The  
290 decision to start nebulisation on strict clinical indications will be made by the  
291 attending ICU-physician and should be evaluated daily. In case the clinical  
292 indication no longer exists, the therapy should be stopped (appendix 3).

293

294 Each routine nebulisation contains of a 3 mL-solution of acetylcysteine (flumucil  
295 100mg/ml, a mucolytic) and a 2.5 mL solution containing salbutamol (ventolin 2.5  
296 Nebules 2.5mg/2.5 ml, a bronchodilator).

297

298 Each nebulisation on strict indication contains of a 3 mL-solution of acetylcysteine  
299 (flumucil 100mg/ml, a mucolytic) and/or a 2.5 mL solution containing salbutamol  
300 (ventolin 2.5 Nebules 2.5mg/2.5 ml, a bronchodilator).

301

302 The solutions are nebulized using a jet nebulizer or a vibrating mesh nebuliser  
303 depending on local standard in the participating center, which is attached to the  
304 ventilator circuit with a T-piece adaptor. Jet nebulizers will be operated synchronized  
305 with the ventilator in case of an internal nebulizer or with pressured gas or oxygen  
306 from an external source in case of a ventilator without an internal nebuliser, with a  
307 flow of 3-5 L/min. If oxygen saturation is insufficient during nebulisation, pressured  
308 gas is replaced by oxygen. The nebulizer will be placed in front of the Y-piece or  
309 between the Y-piece and the circuit prior to the heated humidifier or HME filter. Each  
310 nebulisation session lasts about 20 minutes. If a patient becomes able to breathe

311 without assistance for at least 24 hours but subsequently requires additional  
312 mechanical ventilation within a period of 28 days, the same nebulisation strategy is  
313 resumed.

314

## 315 **5.2 Concomitant medication:**

316 If indicated, nebulisation of other aerosol agents (antibiotics, antimycotics, ilomedine  
317 or iloprost), is allowed in both treatment groups. These agents should be  
318 administered preferably prior to the nebulisation of acetylcysteine and salbutamol, or  
319 otherwise afterwards.

320

## 321 **5.3 Standard procedures**

322

### 323 **5.3.1 Mechanical ventilation**

324 Attending physicians are advised to use lung-protective ventilation strategies,  
325 including the use of lower tidal volumes ( $\leq 6$  mL/kg predicted body weight) and/or  
326 lower airway pressures ( $\leq 30$  cmH<sub>2</sub>O). Levels of positive end-expiratory pressure  
327 (PEEP) and inspired oxygen (FiO<sub>2</sub>) are titrated on PaO<sub>2</sub>, preferably using a PEEP/  
328 FiO<sub>2</sub>-table, and according to local guidelines. If spontaneous ventilation is well  
329 tolerated it is used from then till the end of ventilation. Thereafter, weaning from  
330 ventilation is performed by stepwise lowering of pressure-support level. Daily  
331 assessment of the patient's readiness to wean will be performed. As soon as patients  
332 are ready to be weaned from the ventilator, the pressure-support level is lowered  
333 stepwise to 5 cmH<sub>2</sub>O. A patient is assumed to be ready for extubation when the  
334 following criteria are met:

- 335 • Responsive and cooperative;
- 336 • Adequate cough reflex;
- 337 • PaO<sub>2</sub>/FiO<sub>2</sub> of  $> 200$  mmHg with FiO<sub>2</sub>  $\leq 40\%$ ;
- 338 • Respiratory rate of 8 to 30/minute;
- 339 • No signs of respiratory distress (i.e., marked accessory muscle use, abdominal  
340 paradox, diaphoresis, marked dyspnea);
- 341 • Pressure support level  $< 7$  cm H<sub>2</sub>O;
- 342 • Hemodynamically stable (systolic blood pressure 80 to 160 mmHg and heart rate  
343 40 to 130/min) and no uncontrolled arrhythmia;

- 344 • Rectal temperature > 36.0°C and < 38.0°C.

345

346 **5.3.2 Tracheostomy:**

347 Early tracheostomy has no advantage over late tracheostomy<sup>14</sup>. Tracheostomy is  
348 only to be performed on strict indications and preferably not earlier than 10 days after  
349 intubation.

350 Indications for tracheostomy are assumed:

- 351 • Failure to intubate;  
352 • Expected duration of ventilation > 14 days;  
353 • Glasgow Coma Score < 7 and/or inadequate swallow or cough reflex with  
354 retention of sputum;  
355 • Severe ICU-acquired weakness;  
356 • Prolonged or unsuccessful weaning;  
357 • Repeated respiratory failure after extubation.

358 Readiness for weaning with a tracheostomy follows the same criteria as those in  
359 patients with an endotracheal tube. Although this is applied by a weaning schedule  
360 for unassisted ventilation with a tracheostomy according to the local standard of the  
361 participating centers.

362

363 **5.3.3 Airway Care:**

364 Endotracheal suction will be provided according to the local guidelines. Concomitant  
365 normal saline installation will not be applied.

366 The choice of method of the inhaled air humidification is left to the discretion of the  
367 participating center. Active humidification of the air inhaled will be supplied by the use  
368 of an electrically powered humidifier. Passive humidification of the air inhaled will be  
369 supplied by the use of a heat and moisture exchange (HME) filter. In case of a  
370 (relative) contra-indication for passive humidification, such as lung edema, lung  
371 bleeding or thick and tenacious secretions (Suzukawa classification<sup>13</sup>), active  
372 humidification will be applied. Oral care consist of combining tooth brushing and  
373 rinsing of the oral cavity every 6 hours. Head-of-bed elevation is pursued according  
374 to the IHI ventilator bundle<sup>15</sup>, to prevent ventilator associated pneumonia.

375

376 **5.3.4 Sedation and comfort protocol:**

377 Primary goals of sedation are patient comfort, i.e. to reduce agitation, discomfort and  
378 pain, and to reduce oxygen consumption and physical resistance against daily care  
379 and examination. Insufficient sedation is associated with discomfort, pain, agitation,  
380 delirium and autodetubation<sup>16,17</sup>. In this matter, an analgo-sedative approach is  
381 favored over hypno-sedation, and use of bolus is favored over continuous infusion of  
382 sedating agents. Level of sedation will be determined using the Richmond Agitation  
383 Sedation Scale (RASS)<sup>18</sup>. Pain levels are monitored using the Numeric Rating Scale  
384 (NRS), Visual Analogue Scale (VAS), Critical Care Pain Observation Tool (CCPOT)  
385 or Behavioral Pain Scale (BPS)<sup>19-21</sup>.

386 Delirium is assessed daily using a standardized tool i.e Confusion Assessment  
387 Method for the ICU (CAM-ICU) or the Intensive Care Delirium Checklist Screening  
388 (ICDCS)<sup>22</sup>.

389

390 **5.3.5 Fluid management:**

391 Fluid management will be according to local guidelines. In general, patients are  
392 resuscitated using saline solutions, targeting a urine output of 0.5 – 1.0 ml/kg/hr. After  
393 the first 24 hours, fluid administration is dictated by clinical needs. Blood transfusions  
394 and blood products will be provided if necessary following local guidelines of the  
395 participating centers.

396

397 **5.3.6 Nutrition**

398 Nutrition management will be following local guidelines. Feeding will be started  
399 immediately after admission to achieve an optimal nutritional balance, based on  
400 nutritional status and BMI, with respect to sufficient protein and calorie intake. Enteral  
401 feeding will be performed using a gastric feeding tube. If retention occurs persistently,  
402 a postpyloric feeding tube will be provided. Enteral feeding is preferable to parenteral  
403 feeding.

404

405

406

407 **6. INVESTIGATIONAL PRODUCT**

408

409 **6.1 Name and description of investigational products:**

410 **Acetylcysteine** (a mucolytic): a registered inhalation solution for disorders of the  
411 respiratory tract in which a reduction of the viscosity of the bronchial secretion is  
412 required in order to facilitate expectoration and removal of the secretion, such as  
413 bronchitis, emphysema, cystic fibrosis, and bronchiectasis<sup>23</sup>.

414 **Salbutamol** (a bronchodilator): a registered inhalation solution for treatment of  
415 bronchospasms, exacerbations and routine maintenance therapy in asthma and  
416 COPD<sup>24</sup>.

417

418 **6.2 Summary of findings from non-clinical studies**

419 Little research is published about the effectiveness and safety of nebulized  
420 acetylcysteine. Despite in vitro mucolytic activity, there are no data demonstrating  
421 that nebulized acetylcysteine is an effective therapy for any lung disease<sup>25</sup>.

422 Significantly increased airway resistance, excessive airway secretions and  
423 spontaneous cough were found after aerosol delivery of acetylcysteine (400mg  
424 cumulative dose) through an endotracheal tube in six mechanical ventilated cats with  
425 experimental induced asthma<sup>26</sup>. In addition in a rat model, administration of  
426 acetylcysteine was found to attenuate the inflammatory responses, apoptosis and  
427 ventilator induced lung injury<sup>27</sup>. Described observations of preclinical studies  
428 suggested reductions of pulmonary edema and alveolar clearance in ADRS with  
429 treatment of nebulized beta 2-agonists in rat models and ex vivo human lung tissue<sup>28</sup>.

430

431 **6.3 Summary of findings from clinical studies**

432 There are no data demonstrating that nebulized acetylcysteine is an effective therapy  
433 for any lung disease<sup>25</sup>. Bronchodilator therapy is frequently administered in  
434 mechanically ventilated ICU patients with the aim to resolve bronchoconstriction,  
435 decrease work of breathing and relieve dyspnea. Beta-agonists enhance mucociliary  
436 clearance in normal subjects, although this advantage seems to be diminished during  
437 mechanical ventilation<sup>10</sup>. No significant differences were found in the number of  
438 ventilator free days between patients with ARDS/ALI who received aerosolized  
439 albuterol (salbutamol) versus placebo<sup>29</sup>. The assumption is that nebulisation of

440 bronchodilators is often performed in spite of the absence of an obvious clinical  
441 response in patients without asthma or COPD<sup>10,30–32</sup>  
442 Nebulizing mucolytics and bronchodilators in mechanical ventilated patients carry the  
443 risk of side-effects. First, mucolytic drugs have been reported to provoke  
444 bronchoconstriction<sup>1</sup>. This risk can be reduced by pre-treatment with a  
445 bronchodilator<sup>1</sup>. Nausea or vomiting may be provoked by the bad odor of  
446 Acetylcysteine which is due to the release of hydrogen sulfide<sup>33,34</sup>. Other side effects  
447 include urticarial, pruritis, stomatitis, rhinorroe, irritation of the airways and  
448 hypersensitivity reactions, although frequencies of occurrence are not available<sup>22</sup>.  
449 Second, nebulizing bronchodilators is associated with adverse effects on the  
450 myocardium in COPD patients suffering from preexisting arrhythmias and  
451 hypoxemia<sup>9</sup>. In a study in patients with ALI/ARDS who received albuterol, modest  
452 elevated heart rates were found accompanied with a tendency towards more fluid  
453 resuscitation. Evidence of serious adverse effects including arrhythmias have not  
454 been demonstrated<sup>28</sup>. Other side effects of bronchodilators include, tremor, muscle  
455 cramps, headache, tachycardia and palpitations<sup>7,23</sup>. In addition, nebulisation  
456 interferes with the patient-ventilator interaction, which may lead to hypoventilation,  
457 decreased oxygenation and anxiety<sup>6</sup>.

458

#### 459 **6.4 Summary of known and potential risks and benefits**

460 Acetylcysteine reduces viscosity of mucus. A more liquid state of mucus may  
461 facilitate aspiration of secretions with suction catheters, which may be useful in  
462 intubated patients. Bronchodilators resolve bronchoconstriction, decrease work of  
463 breathing and relieve dyspnea. However, there is actually no evidence that the use of  
464 nebulized mucolytica and bronchodilators is useful in reducing the risk of tube  
465 obstruction, the duration of mechanical ventilation, or the risk of ventilator associated  
466 pneumonia. Nebulisation of acetylcysteine is associated with increased airway  
467 resistance due to bronchoconstriction<sup>1</sup>. Nebulisation of bronchodilators is associated  
468 with systemic effects and could contribute to the generation of tachycardia,  
469 tachyarrhythmias, tremor and agitation<sup>7,23</sup>. Additionally, nebulisation of aerosols in  
470 general interferes with the patient-ventilator interaction, which may lead to  
471 hypoventilation, decreased oxygenation and anxiety<sup>6</sup>.



472 **6.5 Description and justification of route of administration and dosage**

473 Acetylcysteine and salbutamol will be nebulized using a jet nebulizer or a vibrating  
474 mesh nebuliser, depending on local standard in the participating center. The  
475 nebuliser is attached to the ventilator circuit with a T-piece adaptor. Jet nebulisers will  
476 be operated with pressured gas or oxygen at a flow of 3-5 L/min or with an inline flow  
477 synchronized with ventilator. The nebulizer will be placed in front of the Y-piece or  
478 between the Y-piece and the circuit prior to the heated humidifier or HME filter. Each  
479 nebulisation session lasts about 20 minutes. These two types of nebulisers were  
480 chose since we want to study current nebulisation practice but avoid additional risks  
481 by introducing a new procedure with potential serious outcomes. As a consequence  
482 we decided that, although jet nebulizers are most commonly used for nebulizing  
483 mucolytics and bronchodilators during mechanical ventilation, nebulising with a  
484 vibrating mesh nebuliser is allowed in the participating centers were this is standard  
485 practice.

486

487 **6.6 Dosages, dosage modifications and method of administration**

488 Nebulisation of mucolytics (acetylcysteine) and bronchodilators (salbutamol): a 3 mL-  
489 solution of acetylcysteine (flumucil 100mg/ml)<sup>23</sup> and a 2.5 mL solution of salbutamol  
490 (Ventolin 2.5 Nebules 2.5mg/2.5 ml)<sup>24</sup> will be nebulised using a jet nebuliser or  
491 vibrating mesh nebuliser, which is attached to the ventilator circuit with a T-piece  
492 adaptor. These dosages are currently used in Intensive Care practice. The jet  
493 nebuliser will be operated with pressured gas at a flow of 3-5 L/min. The nebulizer  
494 will be placed in front of the Y-piece or between the Y-piece and the circuit prior to  
495 the heated humidifier or HME filter. Each nebulisation session lasts about 20  
496 minutes.

497

498 **6.7 Drug accountability**

499 Flasks of acetylcysteine and salbutamol are provided by the pharmacy of the  
500 participating center. Both agents are widely used and, therefore, are available in  
501 each participating center. Since no placebo will be used, labeling of drugs is not  
502 necessary.

503

504 **7. NON-INVESTIGATIONAL PRODUCT**

505 **7.1 Name and description of non-investigational product(s)**

506 Not applicable.

507

508 **7.2 Summary of findings from non-clinical studies**

509 Not applicable.

510

511 **7.3 Summary of findings from clinical studies**

512 Not applicable.

513

514 **7.4 Summary of known and potential risks and benefits**

515 Not applicable.

516

517 **7.5 Description and justification of route of administration and dosage**

518 Not applicable.

519

520 **7.6 Dosages, dosage modifications and method of administration**

521 Not applicable.

522

523 **7.7 Preparation and labelling of Non Investigational Medicinal Product**

524 Not applicable.

525

526 **7.8 Drug accountability**

527 Not applicable.

528

529

530 **8. METHODS**

531

532 **8.1 Study parameters/endpoints**

533

534 **8.1.1 Main study parameter/endpoint**

535 The primary endpoint is the number of ventilator-free days (VFDs), defined as the  
536 number of days from day 1 to day 28 after ICU admission and start of mechanical  
537 ventilation on which a patient breathes without assistance of the ventilator if the  
538 period of unassisted breathing lasted at least 24 consecutive hours. Patients who die  
539 or are mechanically ventilated longer than this period are assigned zero ventilator-  
540 free days.

541

542 **8.1.2 Secondary study parameters/endpoints**

543 The study will focus on the following secondary outcomes:

- 544 • Side effects of nebulisation of mucolytics and/or bronchodilators (due to  
545 nebulisation itself, or as a result of exposure to the nebulized agents);
- 546 • ICU and hospital stay till day 90;
- 547 • ICU and hospital mortality;
- 548 • Incidence of secondary ARDS using consensus criteria<sup>35</sup>;
- 549 • Clinical defined ventilator-associated pneumonia according to the VAP criteria of  
550 the CDC 2014 (see Appendix 1);
- 551 • Atelectasis (lung opacification on chest radiograph with shift of the mediastinum,  
552 hilum, or hemidiaphragm towards the affected area, and compensatory over  
553 inflation in the adjacent non-atelectatic lung);
- 554 • Health care related costs, including costs of ventilation, stay in ICU and/or  
555 hospital, cumulative use of sedative drugs and neuromuscular blocking agents,  
556 use of tracheostomies, and costs of ventilator-associated pneumonia.

557

558 **8.2 Randomisation, blinding and treatment allocation**

559 Patients will be randomly assigned in a 1:1 ratio to one of both nebulisation strategies  
560 within 24 hours after intubation, after informed consent is signed by the patient or the  
561 patient's legal representative. Randomization will be performed using a dedicated,  
562 password protected, SSL-encrypted website. Randomization sequence is generated  
563 by a dedicated computer randomization software program using random block sizes

564 and is stratified per center. Due to the nature of the intervention blinding of the  
565 caregivers is not possible. Data analysis will be performed blinded for the type of  
566 intervention.

567

### 568 **8.3 Study procedures**

569 Patients will be randomly assigned, after written informed consent is obtained, in a  
570 1:1 ratio to one of the following two nebulisation strategies:

571

572 1. Routine nebulisation: Nebulisation of mucolytics and bronchodilators, administered  
573 every 6 hours (i.e., 4 times per day) within 24 hours after initiation of ventilation  
574 continuing until tracheal extubation.

575

576 2. Nebulisation on clinical indication only: Nebulisation is performed incidentally in  
577 case of a clinical indication according to the same procedure applied in the routine  
578 nebulisation group. Clinical indications are defined as:

- 579 • Occurrence of persistent thick and tenacious secretions following the Suzakawa  
580 criteria<sup>13</sup> (for which nebulisation of mucolytics can be started) and only after active  
581 humidification of the ventilator circuit is set.
- 582 • Occurrence of bronchospasm (for which nebulisation of bronchodilators can be  
583 started) and only when signs and symptoms of bronchospasm (wheezing,  
584 increased airway pressures, increasing airway resistance, up sloping curve of de  
585 end tidal CO<sub>2</sub> monitoring) are confirmed.

586 The decision to nebulize mucolytics and/or bronchodilators is to be made on a daily  
587 basis by the attending ICU–physician. As soon as the clinical indication no longer  
588 exists, the therapy should be stopped (appendix 3).

589

### 590 **8.4 Data to be collected**

591 An overview of the type and timing of data to be collected is given in Appendix 2.

592

#### 593 **8.4.1 On admission and on the ICU:**

- 594 • gender and age
- 595 • height and weight
- 596 • reason for ICU admission
- 597 • reason for ventilation

- 598 • cause of respiratory failure
- 599 • APACHE II score and SAPS II
- 600 • Comorbidity (heartfailure, arrhythmia, pulmonic comorbidity, immune status)
- 601 • Substance abuse
- 602 • Non-invasive ventilation at home
- 603 • Treatment limitation at admission to ICU

604

605 **8.4.2 Baseline parameters 1 hour after intubation:**

- 606 • Mechanical ventilation parameters:
  - 607 - tube size;
  - 608 - tidal volume;
  - 609 - respiratory rate (breath/minute);
  - 610 - level of positive end– expiratory pressure;
  - 611 - peak and plateau pressures, or level of pressure support (level above PEEP,
  - 612 and maximal airway pressure, cmH<sub>2</sub>O);
  - 613 - inspiration to expiration ratio;
  - 614 - inspired oxygen fraction;
  - 615 - minute volume (liters/minute);
  - 616 - pulmonary compliance;
  - 617 - Lung Injury Score <sup>36</sup> and Oxygenation Index<sup>37</sup>
- 618 • Respiratory parameters:
  - 619 - peripheral oxygen saturation (%);
  - 620 - end–tidal fractions of CO<sub>2</sub>; PaO<sub>2</sub>; PaCO<sub>2</sub>; arterial bicarbonate;
  - 621 - arterial pH: arterial base excess.
- 622 • Chest ray (if available)
- 623 • Non respiratory parameters
  - 624 - Heart rate, mean arterial pressure, central venous pressure
  - 625 - Laboratory (if available): Hemoglobin, leukocytes, Potassium

626

627 **8.4.3 Daily from day 1 till detubation\***

- 628 • Mechanical ventilation parameters:
  - 629 - tube size;
  - 630 - tidal volume;

- 631 - respiratory rate (breath/minute);
- 632 - level of positive end– expiratory pressure;
- 633 - peak and plateau pressures, or level of pressure support (level above PEEP,
- 634 and maximal airway pressure, cmH<sub>2</sub>O);
- 635 - inspiration to expiration ratio;
- 636 - inspired oxygen fraction;
- 637 - minute volume (liters/minute);
- 638 - pulmonary compliance;
- 639 - Lung Injury Score<sup>36</sup> and Oxygenation Index<sup>37</sup>
- 640 • Respiratory parameters:
  - 641 - peripheral oxygen saturation (%);
  - 642 - end–tidal fractions of CO<sub>2</sub>; PaO<sub>2</sub>; PaCO<sub>2</sub>; arterial bicarbonate;
  - 643 - arterial pH: arterial base excess.
- 644 • Chest ray (if available)
- 645 • Respiratory status
  - 646 - intubation status
  - 647 - tracheostomy status
  - 648 - invasiveness of ventilation (invasive, non–invasive, intermittent via
  - 649 tracheostomy)
  - 650 - Type of airway humidification (passive, active)
- 651 • Endo tracheal suctioning
  - 652 • Cumulative endotracheal suction procedures
  - 653 • Consistency of tracheal aspirate<sup>13</sup>
  - 654 • Sputum culture (if available)
- 655 • Non respiratory parameters
  - 656 • Heart rate, mean arterial pressure, central venous pressure
  - 657 • Laboratory (if available): Hemoglobin, leukocytes, Potassium
  - 658 • Location of patient (in ICU, hospital, other facility, or home)
  - 659 • Life status (alive or deceased and cause of dead)
- 660 • Non-respiratory parameters:
  - 661 - cumulative fluid balance (ml);
  - 662 - cumulative urine output (ml);
  - 663 - Sequential Organ Failure Assessment score (SOFA) score<sup>38</sup>;

- 664 - blood transfusions (type and ml);
- 665 - infusion of (artificial) colloids (type and ml);
- 666 - extra pulmonic infection, sepsis, re-operation, cardiac arrest
- 667 • Pulmonary complications:
  - 668 - presence of ARDS (yes or no; derived from other data),
  - 669 - pneumonia (yes or no; derived from other data),
  - 670 - atelectases (yes or no; derived from other data)
- 671 • Cumulative use of nebulized
  - 672 - acetylcysteine
  - 673 - salbutamol
  - 674 - other medication
- 675 • Mode of nebulisation (with pressured gas from an external source or
- 676 synchronized with inspiratory airflow from the ventilator)
- 677 • Cumulative use and duration of
  - 678 - Sedatives
  - 679 - analgetics
  - 680 - neuromuscular blocking agents
- 681 • Side-effects associated with:
  - 682 - nebulisation
  - 683 - the administration of acetylcysteine
  - 684 - the administration of salbutamol
- 685 • Tube obstruction:
  - 686 - A CT scan of the endotracheal tube will be performed to assess tube
  - 687 obstruction.

688

**8.4.4 Data collected daily from extubation\* till discharge from the hospital:**

- 690 • Location of patient (ICU, hospital ward)
- 691 • Life status (alive or deceased and cause of dead)

692

693 \*in patients with a tracheostomy, detubation is defined as the moment when a  
694 patient has been free from the ventilator for at least 24 hours.

695

**8.4.5 Data collected at day 90 of follow up:**

697 • Location of patient (in ICU, hospital, other facility, or home)

698 • Life status (alive or deceased and cause of dead)

699

#### 700 **8.4.6 Data to be collected for the economic evaluation**

701 The economic evaluation incorporates health care costs that will be estimated from a  
702 health system perspective over the time horizon of this study. Costs will be

703 determined for both intervention groups during a 28-days follow-up period after initial

704 ICU admission. The costs of medical care will be calculated, divided into direct

705 medical and direct non-medical and indirect costs, if applicable. The direct costs

706 include the costs of (a) ventilation and (b) stay in ICU and/or hospital; (c) costs of

707 cumulative use of sedatives, and (e) neuromuscular blocking agents, (f) the use of

708 tracheostomies, and (g) ventilator-associated pneumonia.

709

#### 710 **8.5 Withdrawal of individual subjects**

711 Subjects can leave the study at any time for any reason if they wish to do so without

712 any consequences. The investigator can decide to withdraw a subject from the study

713 for urgent medical reasons.

714

##### 715 **8.5.1 Specific criteria for withdrawal**

716 A specific reason for withdrawal of a participating patient is translocation of the

717 patient to another hospital that does not participate in this study before discharge

718 from the ICU. If the patient is transferred to another hospital after discharge from the

719 ICU there is no reason for withdrawal.

720

#### 721 **8.6 Replacement of individual subjects after withdrawal**

722 Subjects who are withdrawn from the study will not be replaced. In the sample size

723 calculation a dropout rate of 5% has been taken into account. Analysis will be

724 according to the intention-to-treat principle.

725

#### 726 **8.7 Follow-up of subjects withdrawn from treatment**

727 Reason for withdrawal from nebulisation will be recorded and follow up of subjects

728 will be continued.

729



730 **8.8 Premature termination of the study**

731 A concern regarding safety could be the occurrence of occlusion of the endotracheal  
732 tube due to less administration of mucolytica. To date, data on side effects of  
733 nebulisation of mucolytica and bronchodilators are limited. For mucolytica,  
734 bronchospasms are a well-known side effect. Arrhythmia may be of major concern in  
735 the administration of bronchodilators. An independent Data Safety Monitoring Board  
736 (DSMB) will monitor the study on safety aspects and if necessary recommend  
737 termination of the study.

738

739

740 **9. SAFETY REPORTING**

741

742 **9.1 Section 10 WMO event**

743 In accordance to section 10, subsection 1, of the WMO, the investigator will inform  
744 the subjects and the reviewing accredited METC if anything occurs, on the basis of  
745 which it appears that the disadvantages of participation may be significantly greater  
746 than was foreseen in the research proposal. The study will be suspended pending  
747 further review by the accredited METC, except insofar as suspension would  
748 jeopardize the subjects' health. The investigator will take care that all subjects are  
749 kept informed.

750

751 **9.2 AEs, and SAEs**

752

753 **9.2.1 Adverse events (AEs)**

754 Adverse events are defined as any undesirable experience occurring to a subject  
755 during the study, whether or not considered related to the investigational intervention  
756 judged by the attending ICU physician. All adverse events reported spontaneously by  
757 the subject or observed by the investigator or his staff will be recorded.

758

759 The investigator will appreciate the severity of an event and give his opinion on  
760 whether the event is related or not to the study procedures. The investigator will use  
761 clinical judgement to determine the relationship. Alternative causes, such as natural  
762 history of the underlying diseases, medical history, concurrent conditions,  
763 concomitant therapy, other risk factors, and the temporal relationship of the event to  
764 the study procedures will be considered and investigated.

765

766 Adverse events that are considered related to the study procedures include, but are  
767 not limited to, development of bronchospasm, dyspnea, development of hypoxemia,  
768 hypercapnia and the development of tachycardia, tachyarrhythmia.

769

770 **9.2.2 Serious adverse events (SAEs)**

771 A serious adverse event is any untoward medical occurrence or effect that:

- 772
- results in death;

- 773 • is life threatening (at the time of the event);  
774 • requires hospitalisation or prolongation of existing inpatients' hospitalisation;  
775 • results in persistent or significant disability or incapacity;  
776 • Any other important medical event that may not result in death, be life-  
777 threatening, or require hospitalization, may be considered a serious adverse  
778 experience when, based upon appropriate medical judgement, the event may  
779 jeopardize the subject or may require an intervention to prevent one of the  
780 outcomes listed above.

781

782 SAEs, that are considered related to study procedures, include, but are not limited to,  
783 development of ventilator-associated pneumonia, development of ARDS, new onset  
784 ventricular tachyarrhythmia with hemodynamic instability wherefore an intervention is  
785 indicated and the development of endotracheal tube occlusion. SAEs considered  
786 (possibly) to be related to a study procedure will be reported by the Coordinating PI  
787 to the CCMO and central METC using the CCMO module "ToetsingOnline". The  
788 reporting will occur within 15 days after the investigator has first received information  
789 on the SAE. For fatal or life-threatening cases a preliminary report will be offered  
790 within 7 days followed by a complete report within 8 days.

791 The local site investigator is responsible to report a SAE within 24 hours of the first  
792 knowledge of the event to the Coordinating PI.

793

794 SAEs that are considered unrelated to a study procedure by the PI, will be recorded  
795 and reported in an overview list (line-listing) that will be submitted once every half  
796 year to the METC.

797

### 798 **Documentation**

799

800 All adverse events have to be documented in the participant's chart and in the CRF.  
801 Cases of misuse, or deviations in the administration of the study intervention have to  
802 be documented even when there is no adverse event. In case the AE results in a  
803 persistent disease, the AE has to be classified as a SAE and to be documented at  
804 the end of the trial.

805

806

807

808

809 **9.3 Follow-up of adverse events**

810 All AEs will be followed until they have abated, or until a stable situation has been  
811 reached. Depending on the event, follow up may require additional tests or medical  
812 procedures as indicated, and/or referral to the general physician or a medical  
813 specialist. SAEs need to be reported till end of study within the Netherlands, as  
814 defined in the protocol.

815

816 **9.4 Data Safety Monitoring Board (DSMB)**

817 An DSMB will be installed to monitor safety parameters and the overall conduct of  
818 the study. The DSMB consists of 3 experts of critical care and mechanical ventilated  
819 patients, one of them will be the chairman. They will be supported by an independent  
820 statistician experienced in the statistical methods for clinical research.

821 The composition, tasks, responsibilities, and working procedures of the DSMB are  
822 elaborated in the DSMB Charter (K5. DSMB charter Nebulae versie 2, d.d. 28-07-  
823 2014), which is attached.

824 Following each DSMB meeting, the DSMB will send a confidential report to the  
825 Principal Investigator of each meeting. The report does not include unblinded data  
826 and contains sufficient information to explain the rationale behind any specific  
827 recommendation by the DSMB. Should the Coordinating PI decide not to fully  
828 implement the advice of the DSMB, the Coordinating PI will send the advice to the  
829 reviewing METC, including a note to substantiate why (part of) the advice of the  
830 DSMB will not be follow.

831

832

833

834

835

836

837

838 **10.STATISTICAL ANALYSIS**

839

840 **10.1 General considerations**

841 All analyses will be performed according to the intention-to-treat principle. In addition,  
842 per protocol analyses will be done to check for robustness of results, considering the  
843 trial being a non-inferiority trial. The intention-to-treat analysis considers all patients  
844 as randomized regardless of whether they received the randomized treatment, The  
845 “per protocol” group considers only those patients who complete the treatment  
846 according to the originally allocated protocol. In this non-inferiority trial we include a  
847 hierarchical, superiority, primary efficacy analysis. If the non-inferiority criterion is  
848 satisfied, a secondary analysis for superiority for the primary endpoint will be  
849 conducted. When appropriate, statistical uncertainty will be expressed by the 95%  
850 confidence levels. All statistical analyses will be performed with the R language and  
851 environment for statistical computing<sup>39</sup>.

852 **10.2 Primary study parameter(s)**

853

854 The main analysis will compare the number of ventilator free days between the two  
855 treatment groups to evaluate the non-inferiority hypothesis. The null hypothesis  
856 entails that the nebulisation on indication group is inferior by a margin of 10%to the  
857 routine nebulisation group. If the 95% CI upper bound for inferiority of the nebulized-  
858 on-indication group is < 10%, the null hypothesis of inferiority is rejected. If the non-  
859 inferiority criterion is satisfied, then superiority for the primary endpoint, the number  
860 of ventilator free days will be tested.

861

862 In addition to the parametric analysis (t-test) of the normalized log data of the mean  
863 duration from the ventilator free days between the two groups, we will use a  
864 nonparametric analysis method to test the confidence interval of the difference  
865 between the two medians of the ventilator free days from both groups.

866

867 Additionally, time to freedom from mechanical ventilation is expressed with  
868 Kaplan-Meier curves. Differences between groups will be tested by the log-rank test.  
869 As this is a RCT, we expect that randomization in this study population will  
870 sufficiently balance patients’ baseline characteristics. However if imbalances occur

871 between groups, a Cox proportional hazard model will be used and adjusted  
872 accordingly. The effect of nebulisation on the primary outcome will be investigated in  
873 pre-specified subgroups based on humidification method (active or passive), type of  
874 nebuliser (jet nebuliser or vibrating mesh) and type of flow used for nebulisation  
875 (continues with external source or breath synchronised with an inline flow from the  
876 ventilator).

877

### 878 **10.3 Secondary study parameters**

879 Continuous normally distributed variables will be expressed by their mean and  
880 standard deviation or when not normally distributed as medians and their  
881 interquartile ranges. Categorical variables will be expressed as counts (n) and  
882 percentages (%). To analyze differences in continuous variables between groups the  
883 two test groups Students's t test will be used, or in case continuous data is not  
884 normally distributed, the Mann-Whitney U test will be used. Categorical variables will  
885 be compared with the Chi-square test or Fisher's exact tests. The ICU mortality,  
886 hospital mortality, the length of ICU stay, and the length of hospital stay will be  
887 expressed with Kaplan-Meier curves.

888

### 889 **10.4 Interim analysis**

890 An interim analysis for safety will be performed after the first one third (317) and two  
891 thirds (634) of the study population, respectively are included and have completed  
892 follow up for the primary outcome. The main concern is the occurrence of tube  
893 related incidents in the non-nebulized group, development of ventilator associated  
894 pneumonia in the nebulisation group. Serious adverse events (SAEs) such as death,  
895 ventilator associated pneumonia, ARDS, new onset ventricular tachyarrhythmia with  
896 hemodynamic instability wherefore an intervention is indicated or tube occlusion that  
897 are possibly related to study intervention will be compared.

898

### 899 **10.5 Economic Evaluation**

900 Alongside the proposed RCT a prospective economic study will be performed. The  
901 main question in the economic evaluation is whether the costs of preventive  
902 nebulisation are justified by their beneficial effects compared to nebulisation only on  
903 strict indication. Based on a non-inferior assumption we expect no differences in

904 outcomes. Therefore this prospective cost study is set-up as a cost-benefit analysis  
905 (CBA).

906

### 907 Cost Benefit Analysis

908 The cost benefit analysis (CBA) incorporates health care costs that will be estimated  
909 from a health system perspective over the time horizon of this study. In this economic  
910 evaluation costs will be determined for both intervention groups during a 28-days  
911 follow-up period after initial ICU admission and start of mechanical ventilation. The  
912 costs of medical care will be calculated, divided into direct medical and direct non-  
913 medical and indirect costs if applicable. Costs are defined as the volumes of used  
914 resources multiplied by calculated unit prices. No discounting of costs and effects will  
915 be applied. Although if any difference of interest in primary and/or secondary  
916 outcomes is observed, registered resource use and related costs will be compared  
917 between both intervention groups. In addition a cost-effectiveness analysis, to  
918 calculate incremental cost ratio's (ICER) will be performed.

919

### 920 Cost analysis

921 In this economic evaluation costs associated with 28-days follow-up will be  
922 prospectively determined for 950 intubated and ventilated ICU patients included in  
923 both study groups. Cost-calculations will be set up to reflect a hospital perspective  
924 and will be based on actual resource use in routine care. The direct costs of follow-up  
925 of the study population include the costs of (a) ventilation and (b) stay in ICU and/or  
926 hospital; (c) costs of cumulative use of sedatives, and (e) neuromuscular blocking  
927 agents, (f) the use of tracheostomies, and and (g) ventilator-associated pneumonia.  
928 Initially costs will be estimated for the short term (1 year). Additional costs as a result  
929 of co-morbid conditions will be excluded.

930 Costs are defined as the volumes of used resources multiplied by calculated unit  
931 prices. Unit costs, if available, of used resources will be determined based on  
932 standard current Dutch costing guidelines<sup>40</sup> and market prices. Data on resources  
933 used are collected from the hospital information system (with continuous registration),  
934 the case record form (CRF) and financial reports. Protocol driven costs will be  
935 excluded from the calculations.

936

### 937 Budget Impact Analysis (BIA):

938 Next to the economic evaluation a budget impact analysis (BIA) will be performed  
939 according to the ISPOR Task Force principles<sup>40,41</sup>. The purpose of this BIA is to  
940 estimate the financial impact of the adoption of nebulisation on strict clinical indication  
941 at the national level in the future. The analysis will be based on the decrease in ICU  
942 costs of not applying nebulisation in ventilated assisted patients as estimated during  
943 the study, and the expected number of patients eligible for this treatment in the  
944 Netherlands. Overall costs of the treatment, side effects and other consequences of  
945 both interventions (e.g. follow-up treatment) will be included in the BIA. These  
946 registered data reflect the eligible ICU population. The BIA will be conducted from the  
947 perspective of the different health care payers (i.e. health care providers: the  
948 hospital). The following scenarios will be compared: (a) the intervention change is not  
949 yet implemented, (b) the intervention change is implemented in 100% of the target  
950 group, (c) the intervention change is gradually introduced over a period of two years.  
951 Sensitivity analyses will be performed on the price of the intervention and the  
952 diffusion rate from the hospital perspective. Factors that determine the budget impact  
953 will be determined (clinical outcomes and costs).  
954



955

956 **11.ETHICAL CONSIDERATIONS**

957 **11.1 Regulation statement**

958 The study will be conducted according to the principles of the Declaration of Helsinki  
959 (Forteleza, 2013) and in accordance with the Medical Research Involving Human  
960 Subjects Act (WMO), Good Clinical Practice Guidelines (ICH-GCP) and with local  
961 guidelines.

962

963 **11.2 Recruitment and consent**

964 Consecutive intubated and ventilated ICU patients with an anticipated duration of  
965 ventilation > 24 hours will be screened whether they meet the inclusion criteria.  
966 Patients will be recruited by the executive investigator or the attending ICU-  
967 physician. If the patient is awake and able to judge about his or her situation  
968 properly, information is provided and written informed consent is asked and signed  
969 by the patient within 24 hours after intubation. If a patient is not able to judge about  
970 his or her situation properly, information is provided to the legal representative and  
971 written informed consent is asked and signed by the legal representative within 24  
972 hours after intubation. A second informed consent is asked from the patient in  
973 retrospect, at the moment the patient is awake and able to judge about his or her  
974 situation properly. Information on the study is then provided and written informed  
975 consent is asked and signed by both the executive investigator and the patient. If a  
976 patient declines consent, all collected study data on this patient will be destroyed.

977

978 **11.3 Benefits and risks assessment, group relatedness**

979 Both nebulisation strategies of mucolytics and bronchodilators are frequently used  
980 therapies in Intensive Care Units nationwide. Benefits and risks of both strategies are  
981 uncertain. Since the nebulisation procedures are the same as those in current  
982 standard practice and no additional investigations or intervention will be  
983 administered, the study does not pose an extra burden on patients. The risks of the  
984 patients in the routine nebulisation group include possible occurrence of adverse  
985 reactions due to nebulisation of mucolytics and bronchodilators. These risks are the  
986 same as in current standard clinical practice. Patients randomized to the  
987 'nebulisation on indication only' group will be less exposed to the possible adverse  
988 reactions of nebulisation itself or the drugs nebulized. The risks of the patients in the

989 only on indication nebulisation group include possible occurrence of tube occlusion.  
990 However, the nebulisation treatment will not be withheld if a clinical indication is  
991 present.

992 Patients needing mechanical ventilation are often considered incapacitated due  
993 to their severe illness. Since the strategies to compare in this study are only used in  
994 severely ill mechanical ventilated patients, we consider it inevitable to include these  
995 patients.

996

#### 997 **11.4 Compensation for injury**

998 In this study two standard treatment strategies will be compared. As a consequence  
999 there are no additional risks of participation in this study. Therefore, exemption of  
1000 insurance for additional harm was granted by the Medical Ethical Research  
1001 Committee of the Academic Medical Center for participants in this study. A liability  
1002 insurance will be present in every participating center.

1003

#### 1004 **11.5 Incentives**

1005 Enrolled patients will not receive any special incentives, compensation or treatment  
1006 through participation in this trial.

1007

1008

1009 **12.ADMINISTRATIVE ASPECTS, MONITORING AND PUBLICATION**

1010 **12.1 Handling and storage of data and documents**

1011 Data will be handled confidentially and anonymously. To ensure data security and to  
1012 protect the subjects privacy, data on individual subjects will be encoded according to  
1013 a subject identification code list. Patient data will be entered by way of an eCRF in a  
1014 central GCP proof internet based database to facilitate on-site data-entry. All patients  
1015 will be addressed to the interventions with a random patient identification code.  
1016 Security is guaranteed with login names, login codes and encrypted data transfer.  
1017 The executive investigator safeguards the code and has access to the source data at  
1018 any time. All other investigators will have access to source data as well. When  
1019 necessary for monitoring of the study, access will be granted to the Health Inspectors  
1020 of the Dutch Government (Inspectie voor de Gezondheidszorg) and the members of  
1021 the sponsors of this study; the Academic Medical Center in case of an internal audit.  
1022 Data will be stored in a secure place during a period of 20 years, in the archives of  
1023 the Academic Medical Center, Amsterdam.

1024

1025 **12.2 Monitoring and Quality Assurance**

1026 The study will be monitored according to ICH-GCP guidelines throughout its duration  
1027 by a GCP-certified monitor according to the Monitoring Plan (K6. Monitoringplan  
1028 Nebulae, versie 1).

1029 On-site monitoring will be conducted to evaluate the progress of the study, ensure  
1030 the rights and wellbeing of the subjects are protected, check that the reported clinical  
1031 study data are accurate, complete and verifiable from source documents, and the  
1032 conduct of the study is in compliance with the approved protocol and amendments,  
1033 GCP and applicable national regulatory requirements. A monitoring visit will include a  
1034 review of the essential clinical study documents as well as discussion on the conduct  
1035 of the study with the investigator and staff. Every participating center will be visited  
1036 at least once every year.

1037

1038 **12.3 Amendments**

1039 Amendments are changes made to the research after a favorable opinion by the  
1040 accredited METC has been given. All amendments will be notified to the METC that  
1041 gave a favorable opinion.

1042 A 'substantial amendment' is defined as an amendment to the terms of the METC  
1043 application, or to the protocol or any other supporting documentation, that is likely to  
1044 affect to a significant degree:

- 1045 • the safety or physical or mental integrity of the subjects of the trial;
- 1046 • the scientific value of the trial;
- 1047 • the conduct or management of the trial; or
- 1048 • the quality or safety of any intervention used in the trial.

1049 All substantial amendments will be notified to the METC and to the competent  
1050 authority.

1051 Non-substantial amendments will not be notified to the accredited METC and the  
1052 competent authority, but will be recorded and filed by the sponsor.

1053

#### 1054 **12.4 Annual progress report**

1055 The investigator will submit a summary of the progress of the trial to the accredited  
1056 METC once a year. Information will be provided on the date of inclusion of the first  
1057 subject, numbers of subjects included and numbers of subjects that have completed  
1058 the trial, serious adverse events, other problems, and amendments.

1059

#### 1060 **12.5 End of study report**

1061 The investigator will notify the accredited METC of the end of the study within a  
1062 period of 8 weeks. The end of the study is defined as the last patient's last visit. In  
1063 case the study is ended prematurely, the investigator will notify the accredited METC  
1064 within 15 days, including the reasons for the premature termination. Within one year  
1065 after the end of the study, the investigator will submit a final study report with the  
1066 results of the study, including any publications/abstracts of the study to the  
1067 accredited METC.

1068

#### 1069 **12.6 Public disclosure and publication policy**

1070 The study protocol and analysis plan will be published before start of the study on  
1071 Clinicaltrials.gov and trialregister.nl. The results of the study will find their way into  
1072 (inter-)national scientific journals and guidelines. We will submit analyses to scientific  
1073 journals in the field of intensive care medicine as well as anesthesiology, since both  
1074 ICU physicians and anesthesiologists apply ventilation in the ICU setting.

1075

1076 **13.STRUCTURED RISK ANALYSIS**

1077 **13.1 Synthesis**

1078 Nebulisation solution for both acetylcysteine and salbutamol are registered in The  
1079 Netherlands for disorders of the respiratory tract. In this study both drugs will only be  
1080 applied within this indication. Standard ICU care will be provided in both groups and  
1081 procedures will be performed by experienced trained ICU physicians and nurses. An  
1082 independent Data Safety Management Board (DSMB) will be installed to monitor  
1083 safety parameters and the overall conduct of the study.

1084

1085

1086

1087 **14. REFERENCES**

- 1088 1. Zandstra DF, Stoutenbeek CP, Miranda DR, Care I. Effect of mucolytic and  
1089 bronchodilator aerosol therapy on airway resistance in mechanically ventilated  
1090 patients. *Intensive Care Med.* 1985;11:316–318.
- 1091 2. Grivans C, Lindgren S, Aneman a, Stenqvist O, Lundin S. A Scandinavian survey of  
1092 drug administration through inhalation, suctioning and recruitment maneuvers in  
1093 mechanically ventilated patients. *Acta Anaesthesiol Scand.* 2009;53(6):710–6.  
1094 doi:10.1111/j.1399-6576.2009.01957.x.
- 1095 3. Jelic S, Cunningham JA, Factor P. Clinical review: airway hygiene in the intensive care  
1096 unit. *Crit Care.* 2008;12:209. doi:10.1186/cc6830.
- 1097 4. Houtmeyers E, Gosselink R, Decramer M. SERIES “ CHEST PHYSIOTHERAPY ”  
1098 Effects of drugs on mucus clearance. 1999;(1):452–467.
- 1099 5. Kollef MH, Von Harz B, Prentice D, et al. Patient transport from intensive care  
1100 increases the risk of developing ventilator-associated pneumonia. *Chest.*  
1101 1997;112:765–773. doi:10.1378/chest.112.3.765.
- 1102 6. Beaty CD, Ritz RH, Benson MS. *Continuous in-line nebulizers complicate pressure*  
1103 *support ventilation.* *Chest* 96, 1360–1363 (1989). doi:10.1378/chest.96.6.1360.
- 1104 7. Cazzola M, Page CP, Calzetta L, Matera MG. Pharmacology and Therapeutics of  
1105 Bronchodilators. *Pharmacol Rev.* 2012;64:450–504. doi:10.1124/pr.111.004580.
- 1106 8. Nelson HS, Gross NJ, Levine B, Kerwin EM, Rinehart M, Denis-Mize K. Cardiac safety  
1107 profile of nebulized formoterol in adults with COPD: a 12-week, multicenter,  
1108 randomized, double- blind, double-dummy, placebo- and active-controlled trial. *Clin*  
1109 *Ther.* 2007;29:2167–2178. doi:10.1016/j.clinthera.2007.10.007.
- 1110 9. Cazzola M, Imperatore F, Salzillo A, et al. *Cardiac effects of formoterol and salmeterol*  
1111 *in patients suffering from COPD with preexisting cardiac arrhythmias and hypoxemia.;*  
1112 1998:411–415. doi:10.1378/chest.114.2.411.
- 1113 10. Chang LH, Honiden S, Haithcock JA, et al. Utilization of bronchodilators in ventilated  
1114 patients without obstructive airways disease. *Respir Care.* 2007;52:154–158.
- 1115 11. Hodgson CL, Berney S, Harrold M, Saxena M, Bellomo R. Clinical review: Early  
1116 patient mobilization in the ICU. *Crit Care.* 2013;17:207. doi:10.1186/cc11820.
- 1117 12. Ruokonen E, Parviainen I, Jakob SM, et al. Dexmedetomidine versus  
1118 propofol/midazolam for long-term sedation during mechanical ventilation. *Intensive*  
1119 *Care Med.* 2009;35:282–290. doi:10.1007/s00134-008-1296-0.
- 1120 13. Suzukawa M, Usada Y NK. The effect of sputum characteristics of combining an  
1121 unheated humidifier with a heat-moisture exchanging filter. *Resp Care.* 1989;34::976–  
1122 84.

- 1123 14. Young D, Harrison DA, Cuthbertson BH, Rowan K. Effect of early vs late tracheostomy  
1124 placement on survival in patients receiving mechanical ventilation: the TracMan  
1125 randomized trial. *JAMA*. 2013;309:2121–9. doi:10.1001/jama.2013.5154.
- 1126 15. Narang S. Use of ventilator bundle to prevent ventilator associated pneumonia. *Oman*  
1127 *Med J*. 2008;23(2):96–9. Available at:  
1128 [http://www.pubmedcentral.nih.gov/articlerender.fcgi?artid=3282421&tool=pmcentrez&](http://www.pubmedcentral.nih.gov/articlerender.fcgi?artid=3282421&tool=pmcentrez&rendertype=abstract)  
1129 [endertype=abstract](http://www.pubmedcentral.nih.gov/articlerender.fcgi?artid=3282421&tool=pmcentrez&rendertype=abstract).
- 1130 16. Strøm T, Martinussen T, Toft P. A protocol of no sedation for critically ill patients  
1131 receiving mechanical ventilation: a randomised trial. *Lancet*. 2010;375(9713):475–80.  
1132 doi:10.1016/S0140-6736(09)62072-9.
- 1133 17. Jacobi J, Fraser GL, Coursin DB, et al. analgesics in the critically ill adult.  
1134 2002;30(1):119–141.
- 1135 18. Honiden S, Siegel MD. Analytic reviews: managing the agitated patient in the ICU:  
1136 sedation, analgesia, and neuromuscular blockade. *J Intensive Care Med*.  
1137 2010;25(4):187–204. doi:10.1177/0885066610366923.
- 1138 19. Gélinas C, Fillion L, Puntillo K a, Viens C, Fortier M. Validation of the critical-care pain  
1139 observation tool in adult patients. *Am J Crit Care*. 2006;15(4):420–7. Available at:  
1140 <http://www.ncbi.nlm.nih.gov/pubmed/16823021>.
- 1141 20. Gélinas C, Fortier M, Viens C, Fillion L, Puntillo K. PAIN ASSESSMENT AND M  
1142 ANAGEMENT IN CRITICALLY. 2004;(800):126–136.
- 1143 21. Payen JF, Bru O, Bosson JL, et al. Assessing pain in critically ill sedated patients by  
1144 using a behavioral pain scale. *Crit Care Med*. 2001;29(12):2258–63. Available at:  
1145 <http://www.ncbi.nlm.nih.gov/pubmed/19697008>.
- 1146 22. Plaschke K, von Haken R, Scholz M, et al. Comparison of the confusion assessment  
1147 method for the intensive care unit (CAM-ICU) with the Intensive Care Delirium  
1148 Screening Checklist (ICDSC) for delirium in critical care patients gives high agreement  
1149 rate(s). *Intensive Care Med*. 2008;34(3):431–6. doi:10.1007/s00134-007-0920-8.
- 1150 23. CBG. Flumucil 100mg/ml <http://db.cbg-meb.nl/IB-teksten/h06742.pdf>. :1–4.
- 1151 24. CBG. Ventolin 2.5 Nebules <http://db.cbg-meb.nl/IB-teksten/h12587.pdf>. :3–10.
- 1152 25. Decramer M, Rutten-van Mólken M, Dekhuijzen PNR, et al. Effects of N-acetylcysteine  
1153 on outcomes in chronic obstructive pulmonary disease (Bronchitis Randomized on  
1154 NAC Cost-Utility Study, BRONCUS): a randomised placebo-controlled trial. *Lancet*.  
1155 2005;365(9470):1552–60. doi:10.1016/S0140-6736(05)66456-2.
- 1156 26. Reiner CR, Lee-Fowler TM, Dodam JR, Cohn LA, DeClue AE, Guntur VP.  
1157 Endotracheal nebulization of N-acetylcysteine increases airway resistance in cats with  
1158 experimental asthma. *J Feline Med Surg*. 2011;13:69–73.  
1159 doi:10.1016/j.jfms.2010.09.010.
- 1160 27. Chiang C-H, Chuang C-H, Liu S-L, Chian C-F, Zhang H, Ryu JH. N-acetylcysteine  
1161 attenuates ventilator-induced lung injury in an isolated and perfused rat lung model.  
1162 *Injury*. 2012;43(8):1257–63. doi:10.1016/j.injury.2011.12.026.

- 1163 28. Zingarelli B. Ethyl pyruvate: A simple solution?\*. *Crit Care Med.* 2004;32(7):1603–  
1164 1604. doi:10.1097/01.CCM.0000130819.84296.93.
- 1165 29. Matthay M a, Brower RG, Carson S, et al. Randomized, placebo-controlled clinical trial  
1166 of an aerosolized  $\beta_2$ -agonist for treatment of acute lung injury. *Am J Respir Crit Care*  
1167 *Med.* 2011;184(5):561–8. doi:10.1164/rccm.201012-2090OC.
- 1168 30. Dhand R. Inhalation therapy with metered-dose inhalers and dry powder inhalers in  
1169 mechanically ventilated patients. *Respir Care.* 2005;50:1331–1334; discussion 1344–  
1170 1345.
- 1171 31. Dhand R, Tobin MJ. Bronchodilator delivery with metered-dose inhalers in  
1172 mechanically-ventilated patients. *Eur Respir J.* 1996;9(3):585–595.  
1173 doi:10.1183/09031936.96.09030585.
- 1174 32. Holland A, Smith F, Penny K, Mccrossan G, Veitch L, Nicholson C. Metered dose  
1175 inhalers versus nebulizers for aerosol bronchodilator delivery for adult patients  
1176 receiving mechanical ventilation in critical care units ( Review ) SUMMARY OF  
1177 FINDINGS FOR THE MAIN COMPARISON. 2013;(6).
- 1178 33. Kory RC, Hirsch SR, Giraldo J. Nebulization of N-acetylcysteine combined with a  
1179 bronchodilator in patients with chronic bronchitis. A controlled study. *Dis Chest.*  
1180 1968;54(6):504–9. Available at: <http://www.ncbi.nlm.nih.gov/pubmed/4881157>.
- 1181 34. Henke MO, Ratjen F. Mucolytics in cystic fibrosis. *Paediatr Respir Rev.* 2007;8(1):24–  
1182 9. doi:10.1016/j.prrv.2007.02.009.
- 1183 35. Ferguson ND, Fan E, Camporota L, et al. Erratum to: The Berlin definition of ARDS:  
1184 an expanded rationale, justification, and supplementary material. *Intensive Care Med.*  
1185 2012;38:1731–1732. doi:10.1007/s00134-012-2698-6.
- 1186 36. Murray JF, Matthay MA, Luce JM, Flick MR. An expanded definition of the adult  
1187 respiratory distress syndrome. *Am Rev Respir Dis.* 1988;138:720–723.  
1188 doi:10.1164/ajrccm/138.3.720.
- 1189 37. Ortiz RM, Cilley RE BR. Extracorporeal membrane oxygenation in pediatric respiratory  
1190 failure. *Pediatr Clin North Am.* 1987;34:39–46.
- 1191 38. Vincent J-L, de Mendonca A, Cantraine F, et al. Use of the SOFA score to assess the  
1192 incidence of organ dysfunction/failure in intensive care units. *Crit Care Med.*  
1193 1998;26:1793–1800. doi:10.1097/00003246-199811000-00016.
- 1194 39. R Development Core Team. R: A language and environment for statistical computing.  
1195 R Foundation for Statistical Computing, Vienna, Austria. ISBN 3-900051-07-0, URL  
1196 <http://www.R-project.org/>. *R Found Stat Comput Vienna, Austria.* 2012.
- 1197 40. Tan SS, Hakkaart-van Roijen L, Al MJ, et al. A microcosting study of intensive care  
1198 unit stay in the Netherlands. *J Intensive Care Med.* 2008;23(4):250–7.  
1199 doi:10.1177/0885066608318661.
- 1200 41. Mauskopf JA, Sullivan SD, Annemans L, et al. Principles of good practice for budget  
1201 impact analysis: report of the ISPOR Task Force on good research practices--budget



1202 impact analysis. *Value Heal.* 2007;10:336–347. doi:VHE187 [pii]\n10.1111/j.1524-  
1203 4733.2007.00187.x [doi].

1204

1205

1206 **Appendix 1.**

1207

|                                                                                                                                                                                                                                                                                                                                                                                                                                                                                                                                                                        |
|------------------------------------------------------------------------------------------------------------------------------------------------------------------------------------------------------------------------------------------------------------------------------------------------------------------------------------------------------------------------------------------------------------------------------------------------------------------------------------------------------------------------------------------------------------------------|
| <b>CDC criteria for Clinically defined Ventilator Associated Pneumonia (2014)</b>                                                                                                                                                                                                                                                                                                                                                                                                                                                                                      |
| One or more serial X-rays with one of the following (two or more serial X-rays in patients with underlying disease): <ul style="list-style-type: none"><li>- New or progressive and persistent infiltrate</li><li>- Consolidation</li><li>- Cavitation</li><li>- Pneumatoceles, in <math>\leq 1</math> y.o.</li></ul>                                                                                                                                                                                                                                                  |
| AND                                                                                                                                                                                                                                                                                                                                                                                                                                                                                                                                                                    |
| At least one of the following: <ul style="list-style-type: none"><li>- Fever (<math>&gt;38^{\circ}\text{C}/100.4^{\circ}\text{F}</math>)</li><li>- Leukopenia (<math>&lt;4,000</math> WBC/<math>\text{mm}^3</math>) OR leukocytosis (<math>&gt;12,000</math> WBC/<math>\text{mm}^3</math>)</li><li>- Altered mental status with no other cause, in <math>&gt;70</math> y.o.</li></ul>                                                                                                                                                                                  |
| AND                                                                                                                                                                                                                                                                                                                                                                                                                                                                                                                                                                    |
| At least two of the following: <ul style="list-style-type: none"><li>- New onset of purulent sputum OR change in character of sputum OR <math>\uparrow</math>respiratory secretions OR <math>\uparrow</math>suctioning requirements</li><li>- New onset or worsening cough OR dyspnea OR tachypnea</li><li>- Rales OR bronchial breath sounds</li><li>- Worsening gas exchange (e.g., <math>\text{O}_2</math>desats [e.g., <math>\text{PaO}_2/\text{FiO}_2 &lt; 240</math>], <math>\uparrow\text{O}_2</math>req, OR <math>\uparrow</math>ventilation demand)</li></ul> |

1208

1209

1210

1211

1212

1213  
1214

1215  
1216

Appendix 2

1217

| Data collection                                                                                                                                                                                                                                                                                                                                                                                                  |                            |                   |                  |                  | 1218                 |
|------------------------------------------------------------------------------------------------------------------------------------------------------------------------------------------------------------------------------------------------------------------------------------------------------------------------------------------------------------------------------------------------------------------|----------------------------|-------------------|------------------|------------------|----------------------|
|                                                                                                                                                                                                                                                                                                                                                                                                                  |                            | Baseline (<24 hr) | At randomization | Daily (day 0-28) | 1219<br>1220<br>1221 |
| Baseline                                                                                                                                                                                                                                                                                                                                                                                                         | Gender                     | x                 |                  |                  | 1222                 |
|                                                                                                                                                                                                                                                                                                                                                                                                                  | Age                        | x                 |                  |                  | 1223                 |
|                                                                                                                                                                                                                                                                                                                                                                                                                  | High                       | x                 |                  |                  | 1224                 |
|                                                                                                                                                                                                                                                                                                                                                                                                                  | Weight                     | x                 |                  |                  | 1225                 |
|                                                                                                                                                                                                                                                                                                                                                                                                                  | BMI                        | x                 |                  |                  | 1226                 |
|                                                                                                                                                                                                                                                                                                                                                                                                                  | Reason admission icu       | x                 |                  |                  | 1227                 |
|                                                                                                                                                                                                                                                                                                                                                                                                                  | Reason ventilation         | x                 |                  |                  | 1228                 |
|                                                                                                                                                                                                                                                                                                                                                                                                                  | Cause respiratoir failure  | x                 |                  |                  | 1229                 |
|                                                                                                                                                                                                                                                                                                                                                                                                                  | APACHE II score            | x                 |                  |                  | 1230                 |
|                                                                                                                                                                                                                                                                                                                                                                                                                  | SAPS score                 | x                 |                  |                  | 1231                 |
|                                                                                                                                                                                                                                                                                                                                                                                                                  | Cardiac comorbidity        | x                 |                  |                  | 1232                 |
|                                                                                                                                                                                                                                                                                                                                                                                                                  | Pulmonal comorbidity       | x                 |                  |                  | 1233                 |
|                                                                                                                                                                                                                                                                                                                                                                                                                  | Medication                 | x                 |                  |                  | 1234                 |
|                                                                                                                                                                                                                                                                                                                                                                                                                  | Respiratory parameters     |                   | x                | x                | 1235                 |
| MV parameter                                                                                                                                                                                                                                                                                                                                                                                                     | MV parameters              |                   | x                | x                | 1236                 |
| Location                                                                                                                                                                                                                                                                                                                                                                                                         | ICU/hospital/facility/home |                   |                  | x                | 1237                 |
| Life status                                                                                                                                                                                                                                                                                                                                                                                                      | Alive/deceased             |                   |                  | x                | 1238                 |
|                                                                                                                                                                                                                                                                                                                                                                                                                  | Pulmonary complications    |                   |                  | x                | 1239                 |
|                                                                                                                                                                                                                                                                                                                                                                                                                  | Medication use             |                   |                  | x                | 1240                 |
| Other                                                                                                                                                                                                                                                                                                                                                                                                            | Cumulative fluid balance   |                   |                  | x                | 1241                 |
|                                                                                                                                                                                                                                                                                                                                                                                                                  | Cumulative urine output    |                   |                  | x                | 1242                 |
|                                                                                                                                                                                                                                                                                                                                                                                                                  | SOFA score                 |                   |                  | x                | 1243                 |
|                                                                                                                                                                                                                                                                                                                                                                                                                  | Blood transfusions         |                   |                  | x                | 1244                 |
|                                                                                                                                                                                                                                                                                                                                                                                                                  | Colloid infusion           |                   |                  | x                | 1245                 |
| Side effects                                                                                                                                                                                                                                                                                                                                                                                                     | Nebulisation               |                   |                  | x                | 1246                 |
|                                                                                                                                                                                                                                                                                                                                                                                                                  | Acetylcysteine             |                   |                  | x                | 1247                 |
|                                                                                                                                                                                                                                                                                                                                                                                                                  | Salbutamol                 |                   |                  | x                | 1248                 |
| Abbreviations: BMI: body mass index; MV: mechanical ventilation;NIV: non-invasive mechanical ventilation;<br>APACHE II: Acute Physiology and Chronic Health Evaluation II;SAPS II: Simplified acute physiology score II;PEEP:<br>positive end expiratory pressure; IE ratio: inspiratory expiratory ratio; FiO2: Fraction inspired oxygen; MV: minute<br>volume; SOFA score: sequential Organ Failure Assessment |                            |                   |                  |                  | 1249                 |
|                                                                                                                                                                                                                                                                                                                                                                                                                  |                            |                   |                  |                  | 1250                 |
|                                                                                                                                                                                                                                                                                                                                                                                                                  |                            |                   |                  |                  | 1251                 |

1248  
1249  
1250  
1251

1252

1253

1254 **Appendix 3.**

1255

1256 **Protocol: Nebulisation in the “nebulisation on clinical indication only” arm:**

1257

1258 Nebulisation is performed incidentally in case of a clinical indication according to the  
1259 same procedure applied in the routine nebulisation group.

1260

1261 Clinical indications are defined as:

1262

1263 Mucolytics:

1264 In case of occurrence of persistent thick and tenacious secretions, following the  
1265 Suzakawa criteria\* observed during daily care by nurse or physician, the  
1266 attending ICU-physician starts the following protocol:

- 1267 1. Start active humidification of the ventilator circuit
- 1268 2. In case of persistent tick and tenacious secretions prescribe four times daily  
1269 nebulization of 3 mL-solution of acetylcysteine (fluimucil 100mg/ml) and record  
1270 indication in the medical chart.
- 1271 3. Reconsider daily whether this indication is still present or whether nebulisation  
1272 can be withdrawn again and record in the medical chart.

1273

1274 Bronchodilators:

1275 In case of occurrence of bronchospasm, defined as occurrence of at least one of  
1276 following signs and symptoms of bronchospasm: wheezing, increased airway  
1277 pressures, increasing airway resistance, up sloping curve of de end tidal CO2  
1278 monitoring, the attending ICU-physician starts the following protocol:

- 1279 1. Prescribe four times daily nebulization of 2.5 mL solution of salbutamol (Ventolin  
1280 2.5 Nebules 2.5mg/2.5 ml) and record indication in the medical chart.
- 1281 2. Reconsider daily whether this indication is still present or whether nebulisation  
1282 can be withdrawn again and record in the medical chart.

1283

1284 \*Suzakawa criteria secretion :

1285 *Class 1- aqueous:* no secretion remains behind on the inside of the suction catheter

## **C1. Onderzoeksprotocol Nebulae NL47807 018 14, versie 6**

---

- 1286 *Class 2- sticky:* some secretion remains behind on the inside of the suction catheter,  
1287 simply removable with rinsing fluid
- 1288 *Class 3- thick/tenacious:* secretion remains behind on the inside of the suctioning  
1289 catheter, which cannot be flushed away after two times of rinsing with fluid  
1290
